# Supplementary material for: Direct in situ labeling of target drugs with a fluorophore probe to improve MALDI-MS detection sensitivity in micro-liter plasma
Source: PubMed Central journal article supplement (PMC6658545; doi:10.1038/s41598-019-47147-y), 2019-07-25
Supplement: 41598_2019_47147_MOESM1_ESM.pdf [file 41598_2019_47147_MOESM1_ESM.pdf]

# **Electronic Supplementary Material**

## **Direct in situ labeling of target drugs with a fluorophore probe to improve MALDI-MS detection sensitivity in micro-liter plasma**

**Yi-Shan Li <sup>1</sup> • Chi-Yu Lu <sup>1, 2, 3, 4</sup>**

<sup>1</sup> Department of Biochemistry, College of Medicine, Kaohsiung Medical University,  
Kaohsiung 80708, Taiwan

<sup>2</sup> Research Center for Environmental Medicine, Kaohsiung Medical University,  
Kaohsiung 80708, Taiwan

<sup>3</sup> Institute of Medical Science and Technology, National Sun Yat-sen University,  
Kaohsiung 80424, Taiwan

<sup>4</sup> Department of Medical Research, Kaohsiung Medical University Hospital,  
Kaohsiung 80708, Taiwan

✉ Chi-Yu Lu

cylu@kmu.edu.tw

Table S1. Effects of fluorophore probes on the formation of ibuprofen derivative

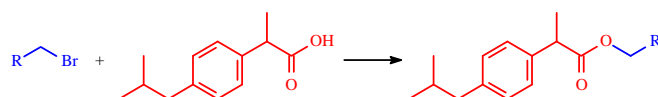

| Probe  | Structure | Relative response (%) |
|--------|-----------|-----------------------|
| Br-MBT |           | 100                   |
| Br-MQ  |           | 6                     |
| Br-DMC |           | < 1                   |
| Br-MAC |           | < 1                   |
| Br-MA  |           | < 1                   |
| Br-AC  |           | no signal             |
| Br-AP  |           | no signal             |

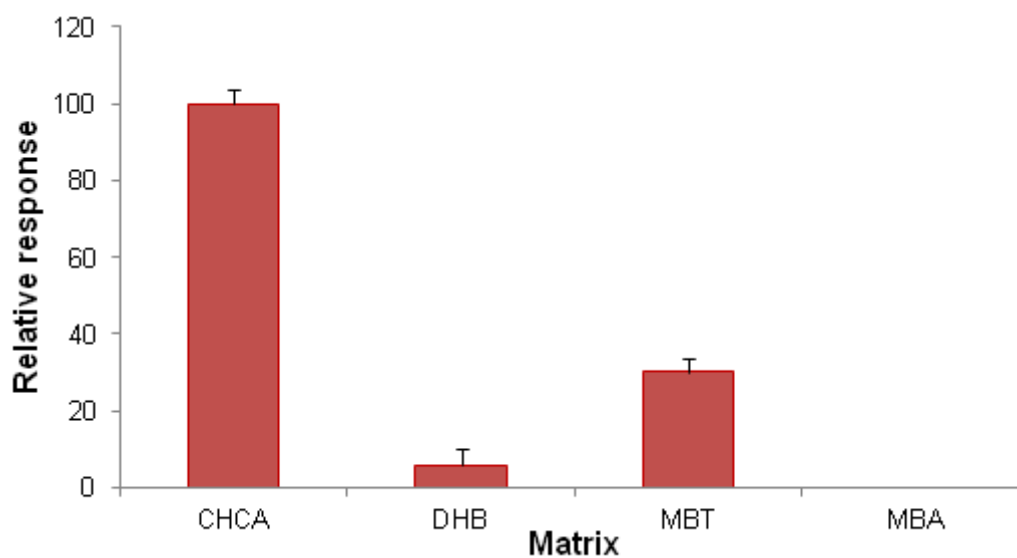

**Figure S1** Effects of the matrix on detection of ibuprofen derivative signal in human plasma.

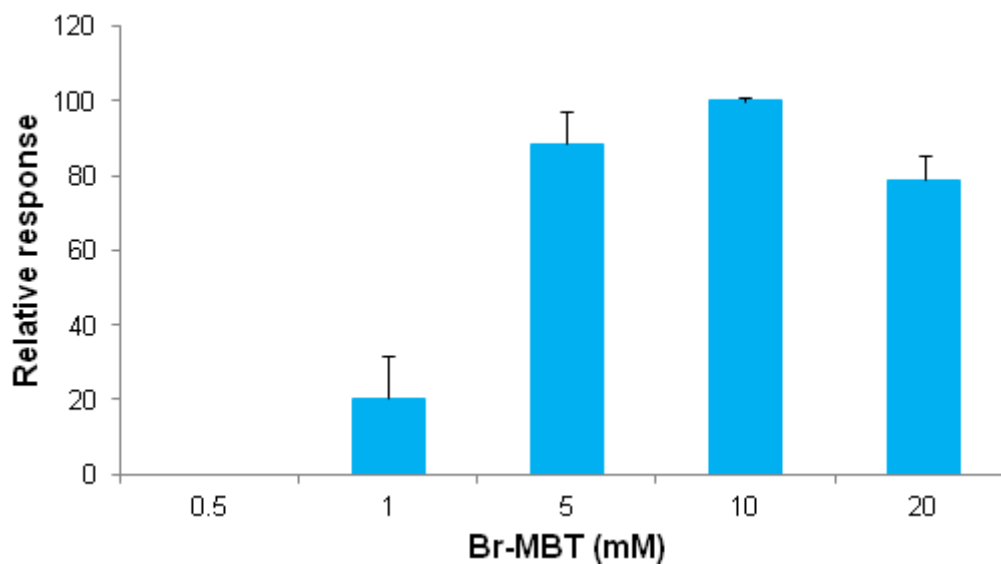

**Figure S2** Effect of Br-MBT concentration on formation of the ibuprofen derivative.

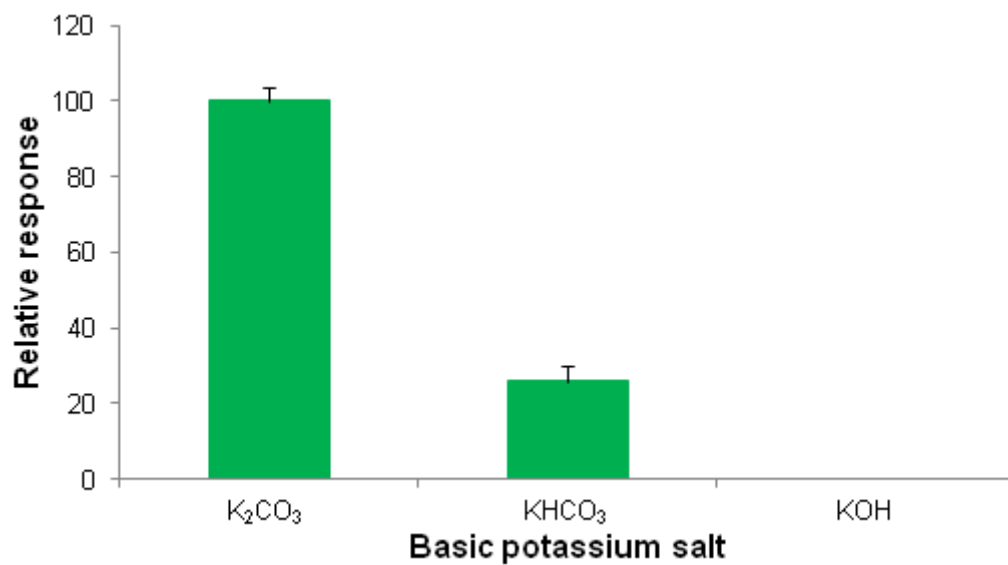

**Figure S3** Effects of basic potassium salts on the formation of the ibuprofen derivative.

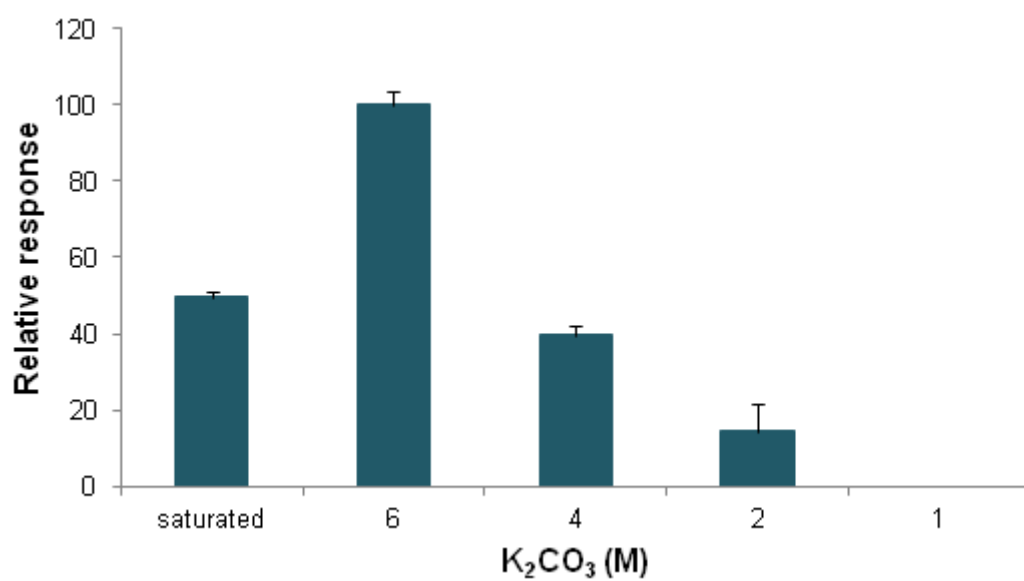

**Figure S4** Effects of  $K_2CO_3$  concentration on the formation of the ibuprofen derivative.

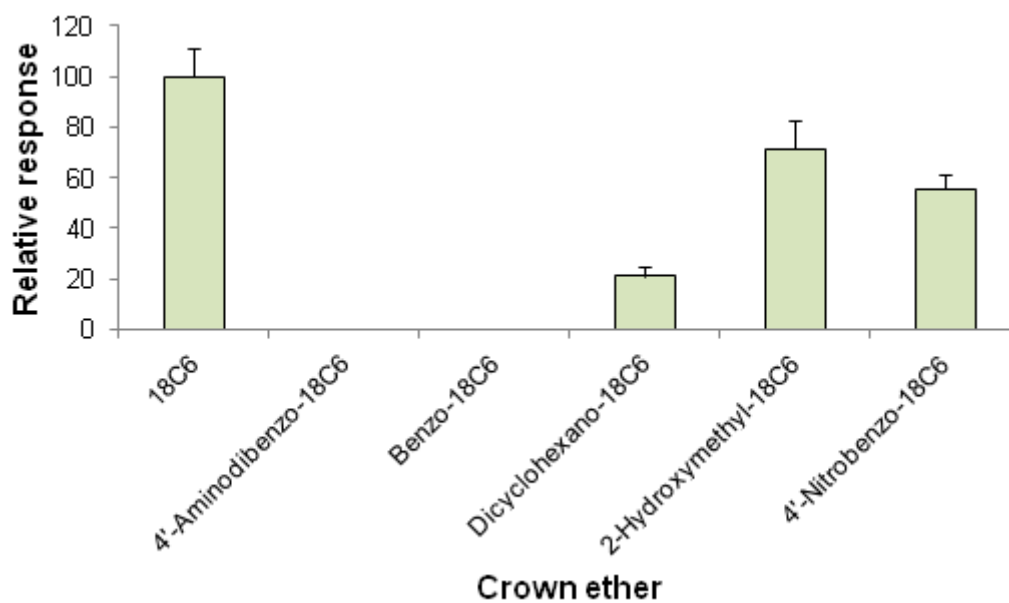

**Figure S5** Effect of the different 18-crown-6 (18C6) crown ethers on the formation of the ibuprofen derivative.

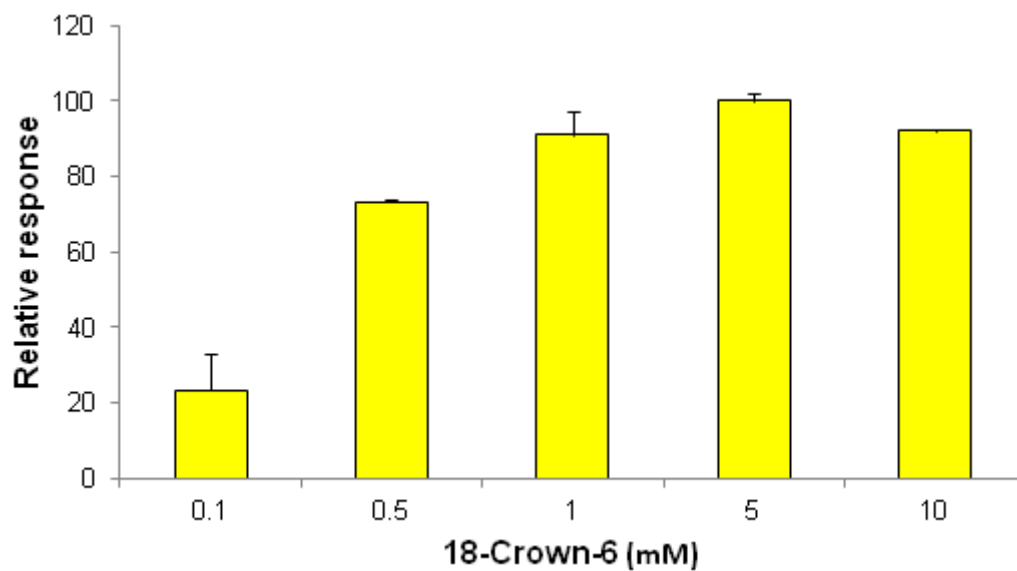

**Figure S6** Effect of 18-crown-6 concentration on the formation of the ibuprofen derivative.

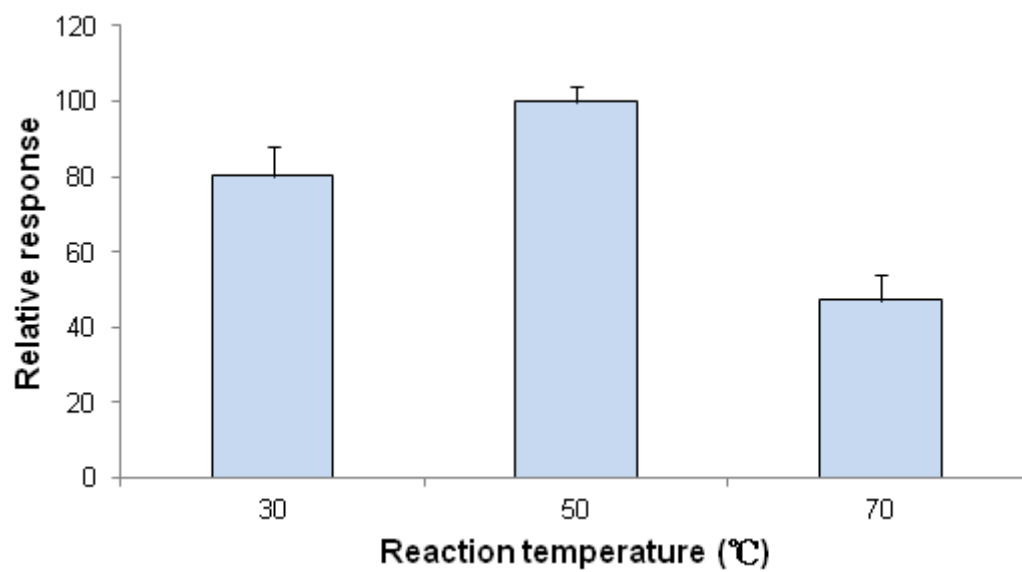

**Figure S7** Effect of the reaction temperature on the formation of the ibuprofen derivative.

Table S2. Comparison of current methods for analysis of ibuprofen

| Analytical method | Sample       | Sample volume (µL) | Sample preparation    | Analytical time (min) | LOD (µg/mL) | Mobile phase/ carrier gas                                               | Ref.      |
|-------------------|--------------|--------------------|-----------------------|-----------------------|-------------|-------------------------------------------------------------------------|-----------|
| LC-UV             | human plasma | 1000               | LLE                   | 3.5                   | 0.04        | acetonitrile, phosphoric acid                                           | [1]       |
| LC-FLD            | human plasma | 500                | LLE                   | 20                    | 0.1         | acetonitrile, acetic acid, triethylamine                                | [2]       |
| LC-UV             | human plasma | 50                 | SPE                   | 5                     | -           | acetonitrile, phosphoric acid                                           | [3]       |
| LC-UV             | human plasma | 100                | protein precipitation | 12.5                  | 1           | methanol, potassium hydrogen phosphate                                  | [4]       |
| LC-MS/MS          | human plasma | 100                | LLE                   | 1.5                   | -           | methanol, acetonitrile, ammonium formate buffer                         | [5]       |
| LC-MS/MS          | human plasma | 50                 | LLE<br>SPE            | 13                    | 0.02        | methanol, acetic acid                                                   | [6]       |
| LC-MS/MS          | human plasma | 20                 | LLE                   | 8                     | 0.02        | methanol, formic acid                                                   | [7]       |
| LC-UV             | human plasma | 1000               | direct injection      | 14                    | 0.07        | sodium dodecyl sulfate, n-propanol, triethylamine, orthophosphoric acid | [8]       |
| GC-MS/MS          | human plasma | 10                 | LLE                   | 8                     | -           | helium                                                                  | [9]       |
| MALDI-TOF MS      | human plasma | 5                  | micro-labeling        | < 1                   | 0.1         | -                                                                       | This work |

Abbreviations: UV, ultraviolet; FLD, fluorescence detector; MS, mass spectrometry; LC, liquid chromatography; GC, gas chromatography; LLE, liquid-liquid extraction; SPE, solid phase extraction; LOD, limit of detection; Ref., reference.

## References

1. Litowitz, H., Olanoff, L. & Hoppel, C.L. Determination of ibuprofen in human plasma by high-performance liquid chromatography. *J. Chromatogr. B Analyt Technol.*

- Biomed. Life Sci.* **311**, 443-448 (1984).
- Canaparo, R., Muntoni, E., Zara, G.P., Pepa, C.D., Berno, E., Costa, M. & Eandi, M. Determination of Ibuprofen in human plasma by high-performance liquid chromatography: validation and application in pharmacokinetic study. *Biomed. Chromatogr.* **14**, 219-226 (2000).
  - Farrar, H., Letzig, L. & Gill, M. Validation of a liquid chromatographic method for the determination of ibuprofen in human plasma. *J. Chromatogr. B* **780**, 341-348 (2002).
  - Ganesan, M., Rauthan, K.S., Pandey, Y. & Tripathi, P. Determination of ibuprofen in human plasma with minimal sample pretreatment. *Int. J. Pharm. Sci. Res.* **1**, 120-127 (2010).
  - Seelam, R.R., Chandiran, I.S., Jayaveera, K.N. & Divi, K.R. Quantification of Ibuprofen in human plasma by using high throughput liquid chromatography–tandem mass spectrometric method and its applications in pharmacokinetics. *Arch. Appl. Sci. Res.* **2**, 101-111 (2010).
  - Nakov, N., Petkovska, R., Ugrinova, L., Kavrakovski, Z., Dimitrovska, A. & Svinarov, D. Critical development by design of a rugged HPLC-MS/MS method for direct determination of ibuprofen enantiomers in human plasma. *J. Chromatogr. B* **992**, 67-75 (2015).
  - Chen, T., Li, Q., Lu, J., Yu, C., Chen, C. & Li, Z. Determination of ibuprofen enantiomers in human plasma by HPLC–MS/MS: validation and application in neonates. *Bioanalysis* **8**, 1237-1250 (2016).
  - Talaat, W. Bioanalytical method for the estimation of co-administered esomeprazole, leflunomide and ibuprofen in human plasma and in pharmaceutical dosage forms using micellar liquid chromatography. *Biomed. Chromatogr.* **31**, e3865 (2017).
  - Tsikis, D., Kayacelebi, A.A., Hanff, E., Mitschke, A., Beckmann, B., Tillmann, H.C., Gutzki, F.M., Müller, M. & Bernasconi, C. GC-MS and GC-MS/MS measurement of ibuprofen in 10- $\mu$ L aliquots of human plasma and mice serum using [ $\alpha$ -methyl- $^2$ H $_3$ ]ibuprofen after ethyl acetate extraction and pentafluorobenzyl bromide derivatization: Discovery of a collision energy-dependent H/D isotope effect and pharmacokinetic application to inhaled ibuprofen-arginine in mice. *J. Chromatogr. B* **1043**, 158-166 (2017).



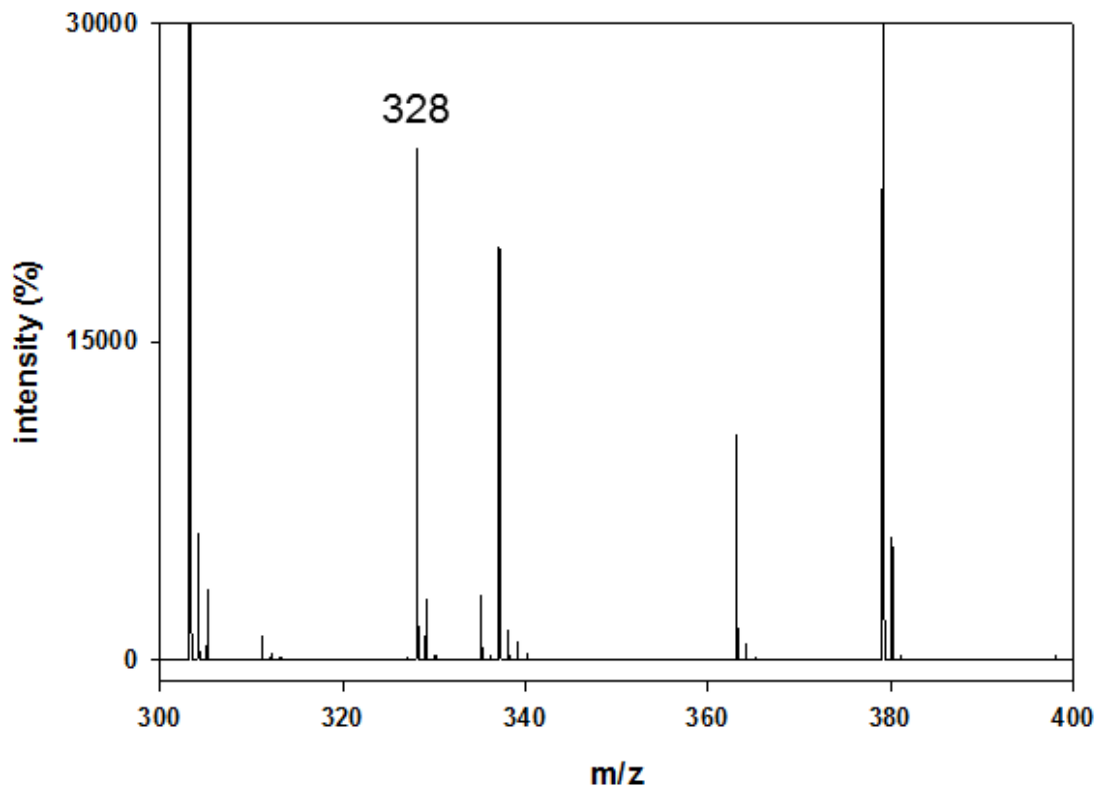

**Figure S8-1** Mass spectrum for the analysis of aspirin spiked in human plasma,  $[M+H]^+$  signal appears at m/z 328.

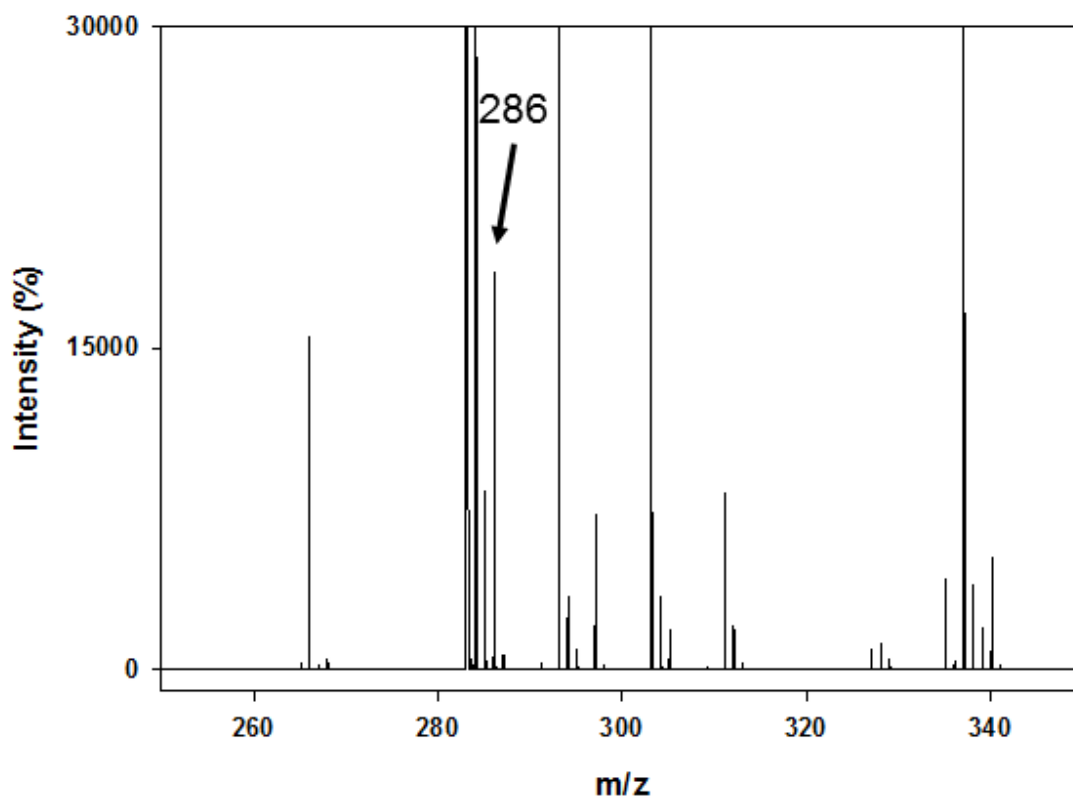

**Figure S8-2** Mass spectrum for the analysis of salicylic acid spiked in human plasma,  $[M+H]^+$  signal appears at m/z 286.

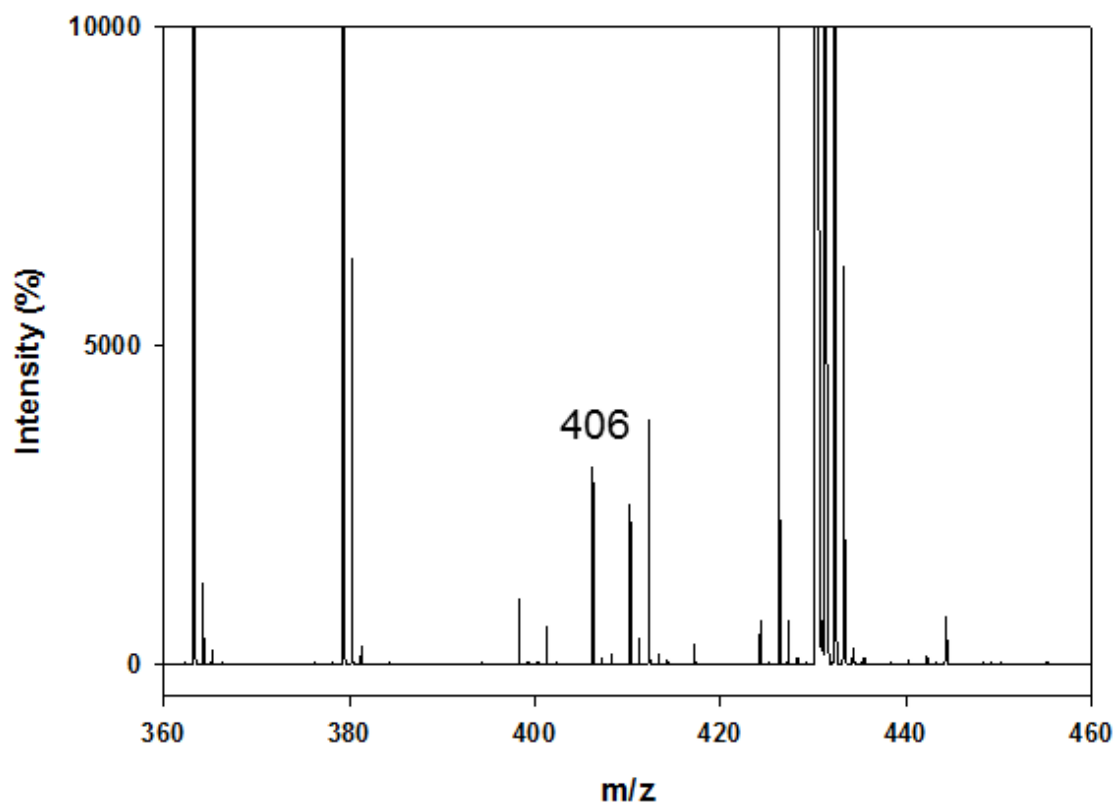

**Figure S8-3** Mass spectrum for the analysis of salsalate spiked in human plasma,  $[M+H]^+$  signal appears at  $m/z$  406.

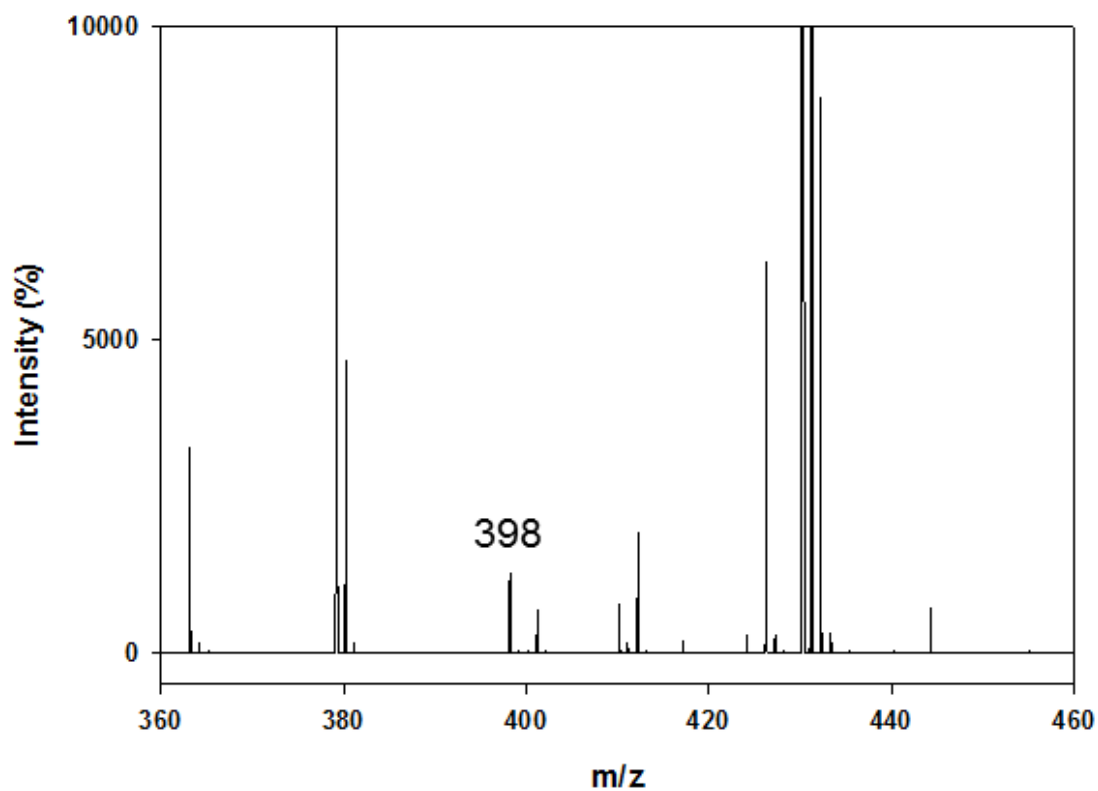

**Figure S8-4** Mass spectrum for the analysis of diflunisal spiked in human plasma,  $[M+H]^+$  signal appears at  $m/z$  398.

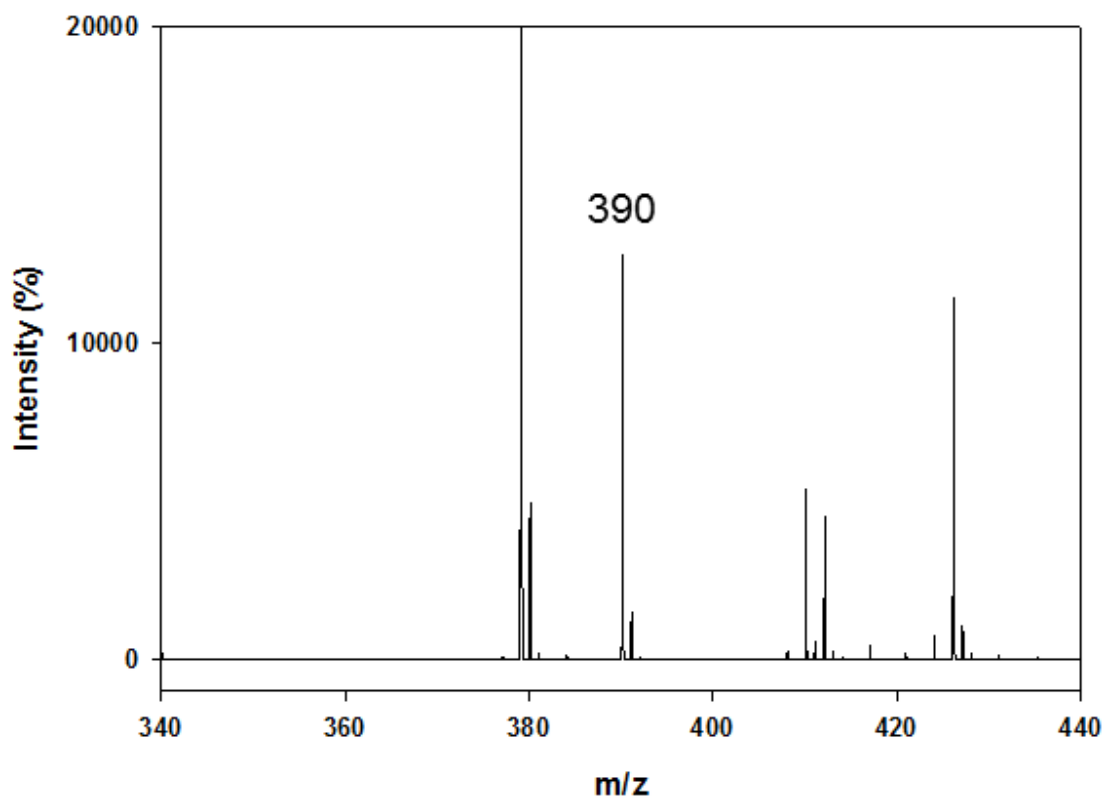

**Figure S8-5** Mass spectrum for the analysis of fenopropfen spiked in human plasma,  $[M+H]^+$  signal appears at m/z 390.

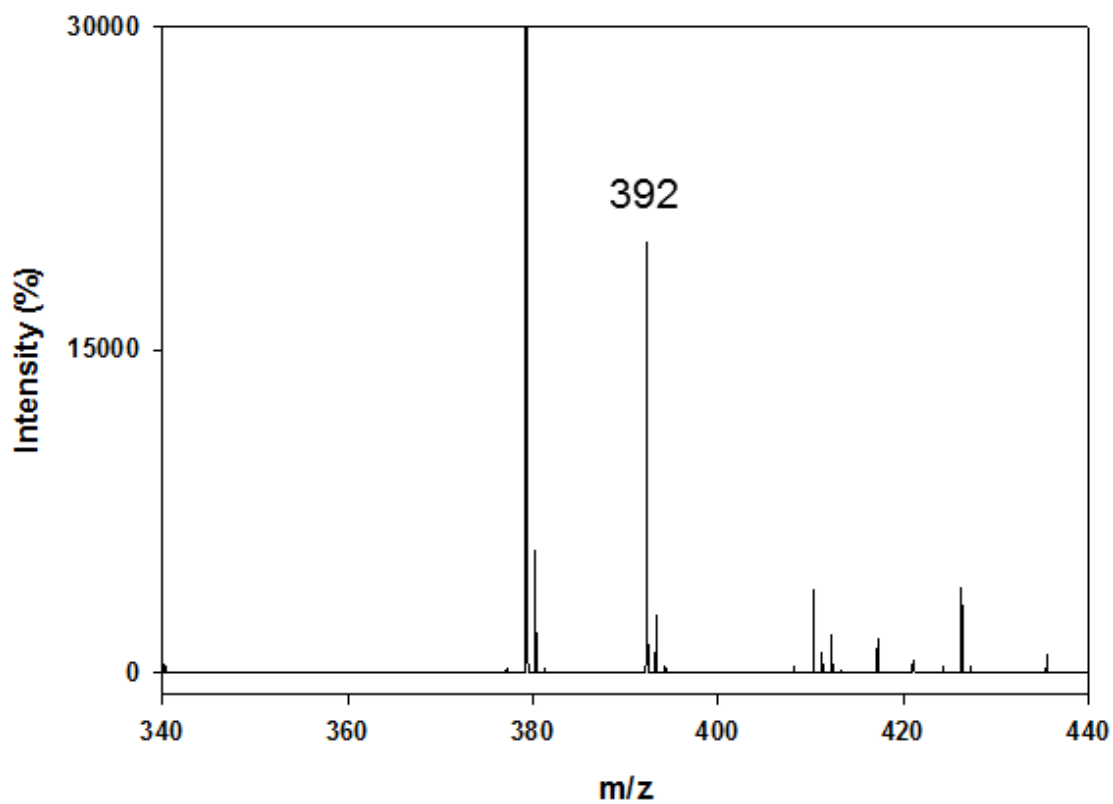

**Figure S8-6** Mass spectrum for the analysis of flurbiprofen spiked in human plasma,  $[M+H]^+$  signal appears at m/z 392.

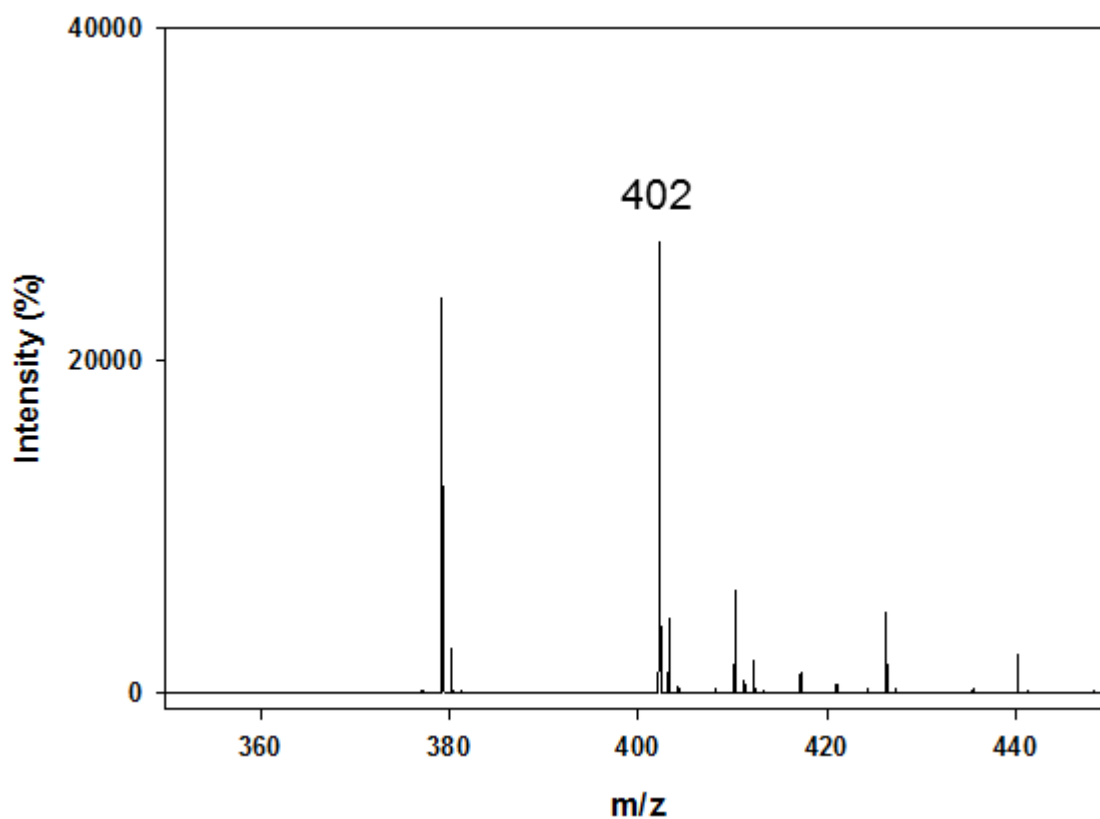

**Figure S8-7** Mass spectrum for the analysis of ketoprofen spiked in human plasma,  $[M+H]^+$  signal appears at m/z 402.

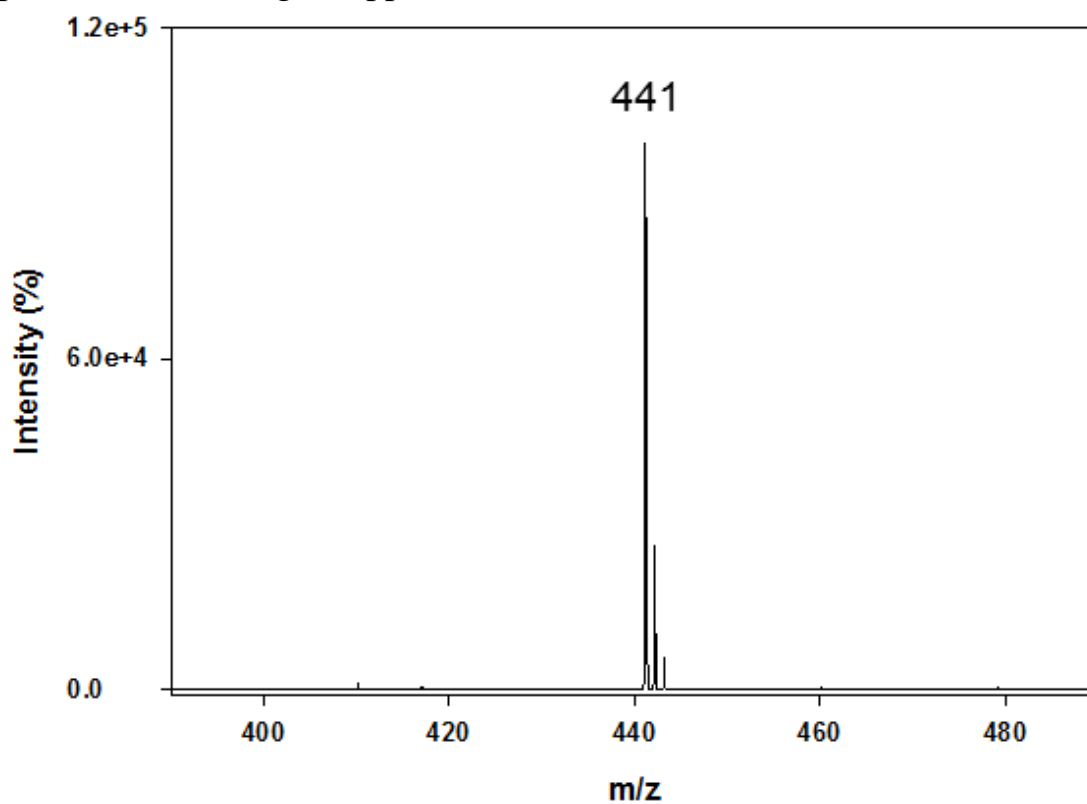

**Figure S8-8** Mass spectrum for the analysis of oxaprozin spiked in human plasma,  $[M+H]^+$  signal appears at m/z 441.

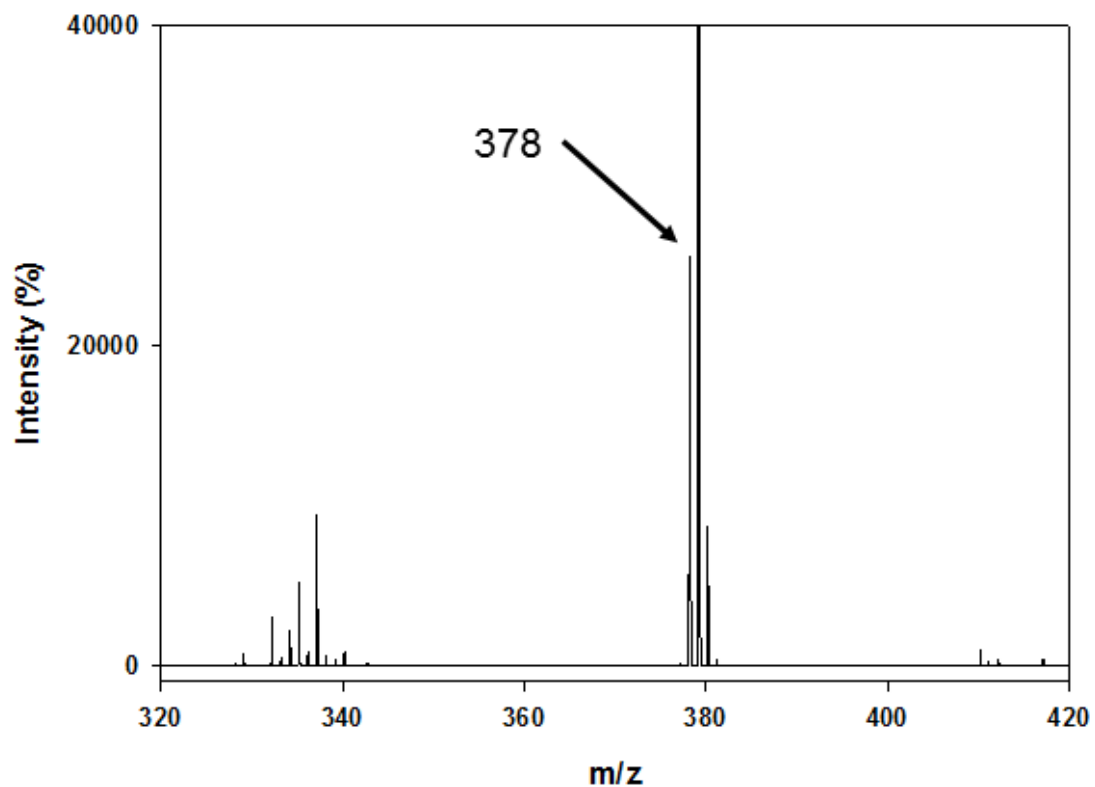

**Figure S8-9** Mass spectrum for the analysis of naproxen spiked in human plasma,  $[M+H]^+$  signal appears at m/z 378.

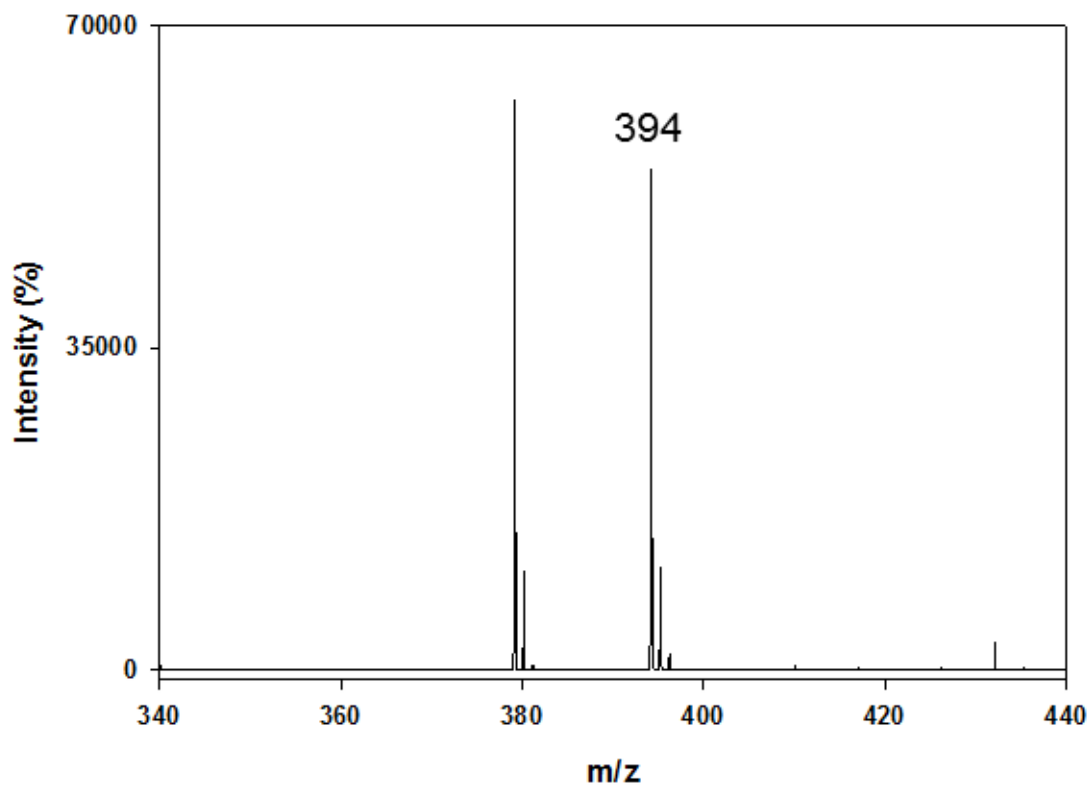

**Figure S8-10** Mass spectrum for the analysis of loxoprofen spiked in human plasma,  $[M+H]^+$  signal appears at m/z 394.

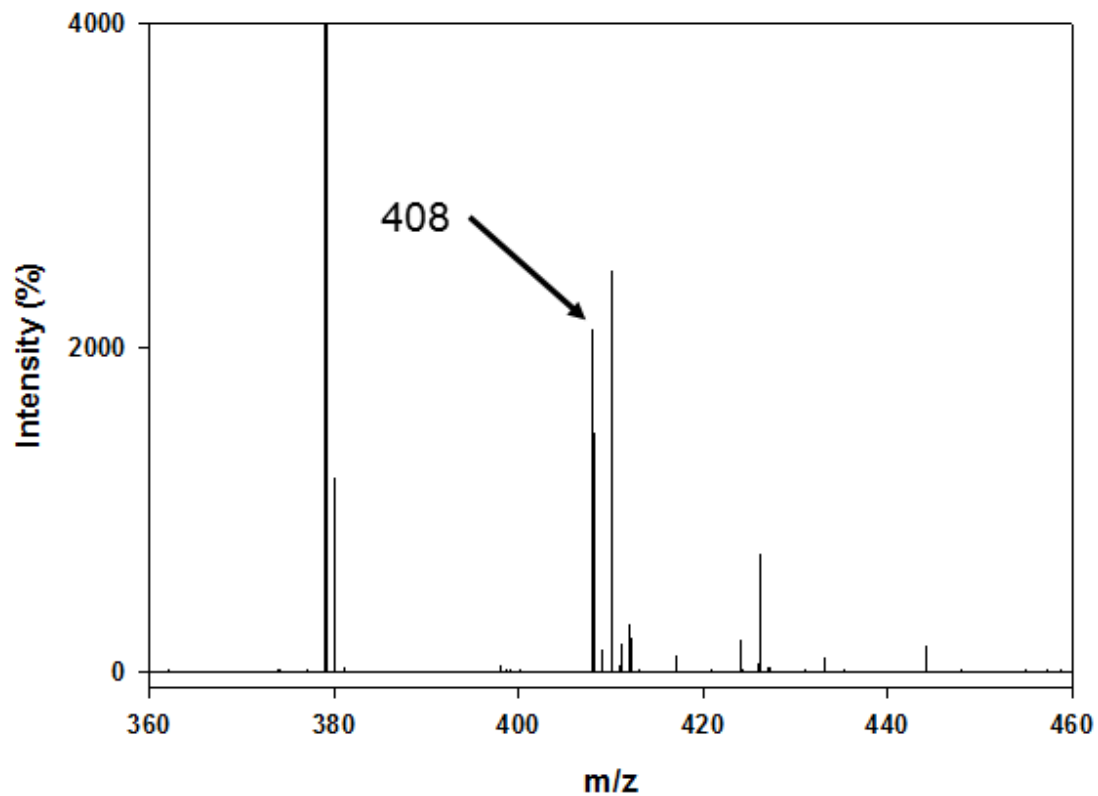

**Figure S8-11** Mass spectrum for the analysis of tiaprofenic acid spiked in human plasma,  $[M+H]^+$  signal appears at m/z 408.

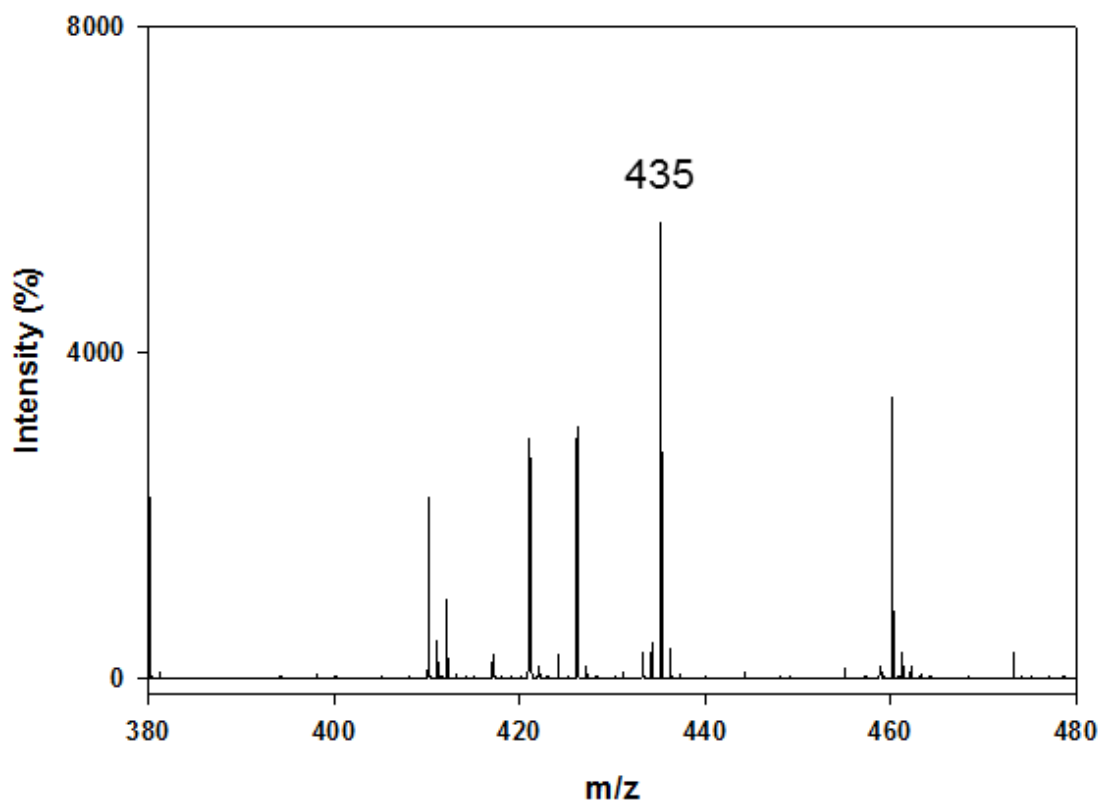

**Figure S8-12** Mass spectrum for the analysis of etodolac spiked in human plasma,  $[M+H]^+$  signal appears at m/z 435.

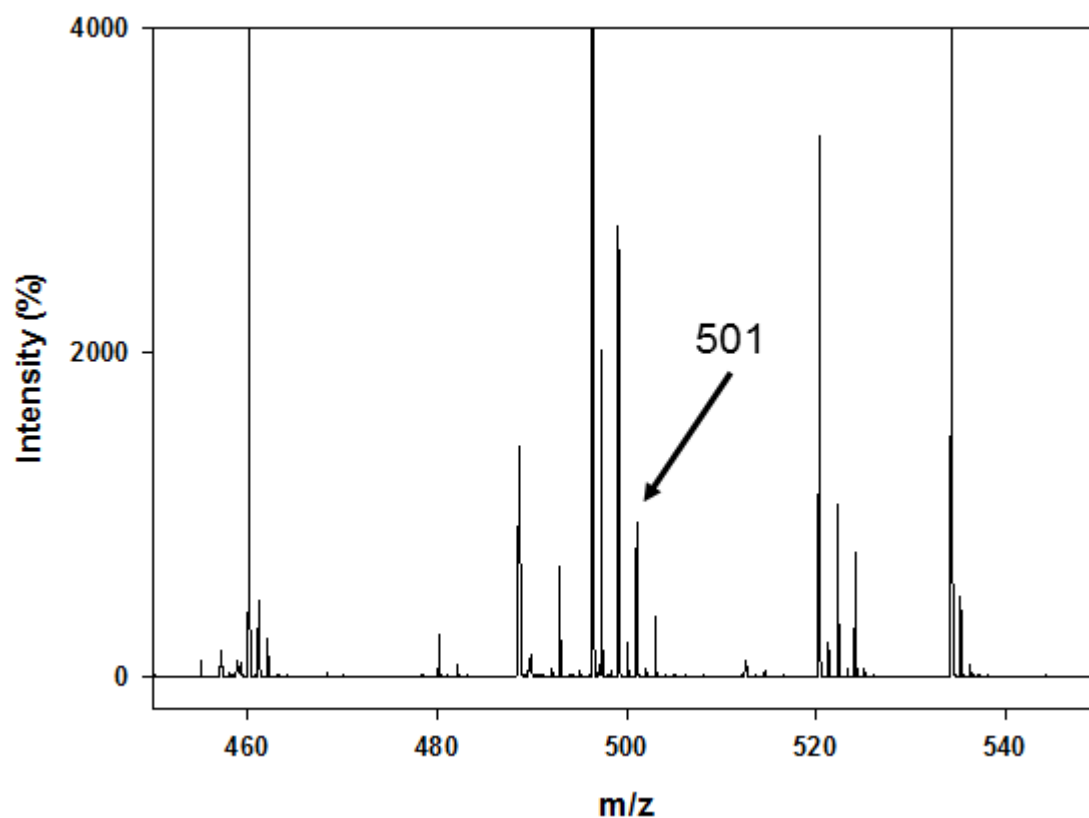

**Figure S8-13** Mass spectrum for the analysis of aceclofenac spiked in human plasma,  $[M+H]^+$  signal appears at  $m/z$  501.

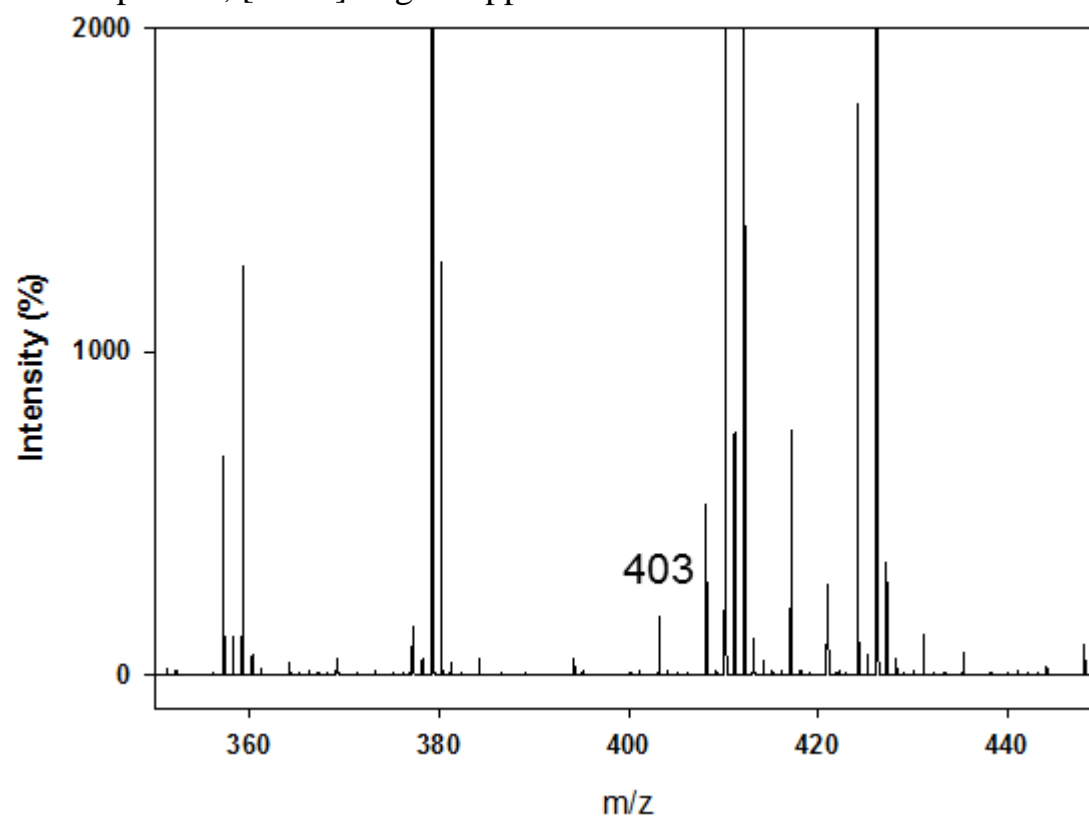

**Figure S8-14** Mass spectrum for the analysis of ketorolac spiked in human plasma,  $[M+H]^+$  signal appears at  $m/z$  403.

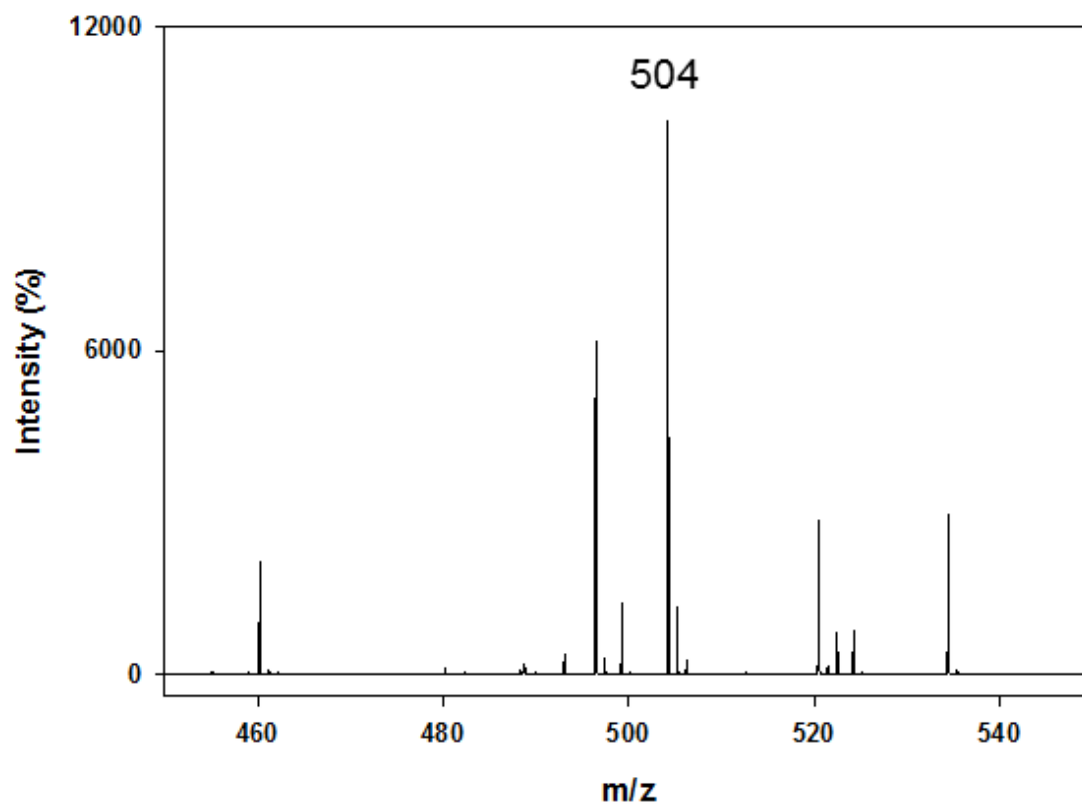

**Figure S8-15** Mass spectrum for the analysis of sulindac spiked in human plasma,  $[M+H]^+$  signal appears at m/z 504.

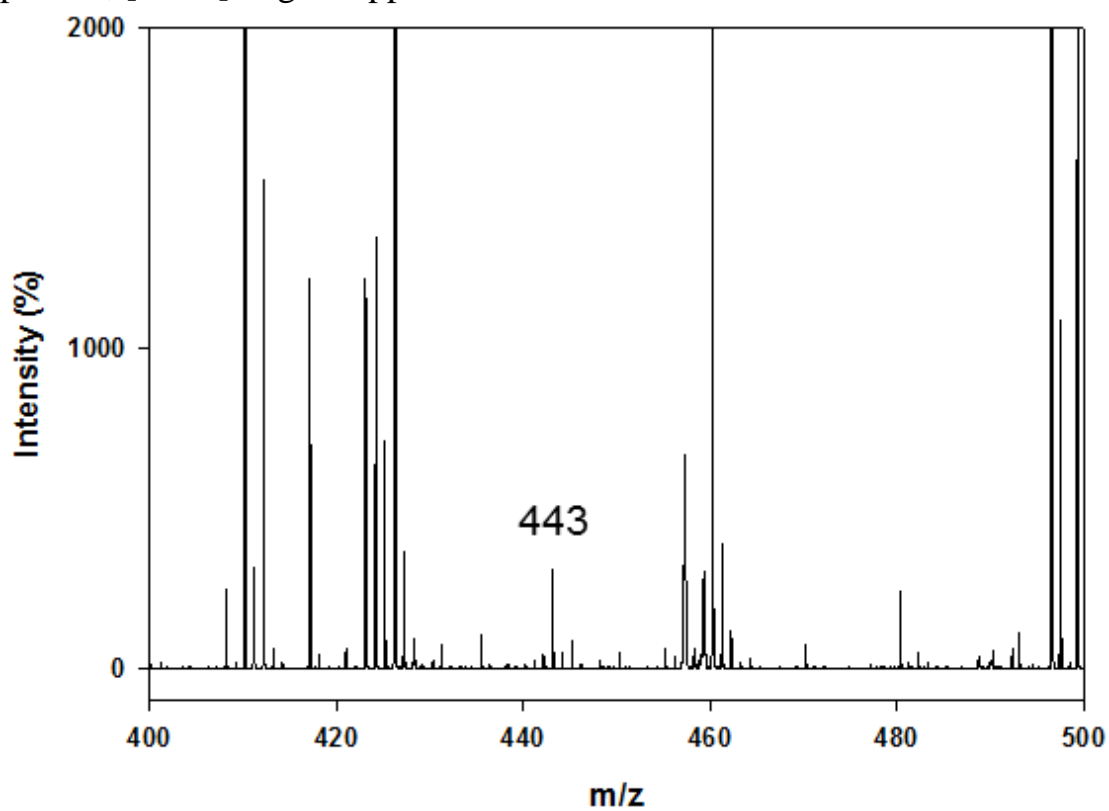

**Figure S8-16** Mass spectrum for the analysis of diclofenac spiked in human plasma,  $[M+H]^+$  signal appears at m/z 443.



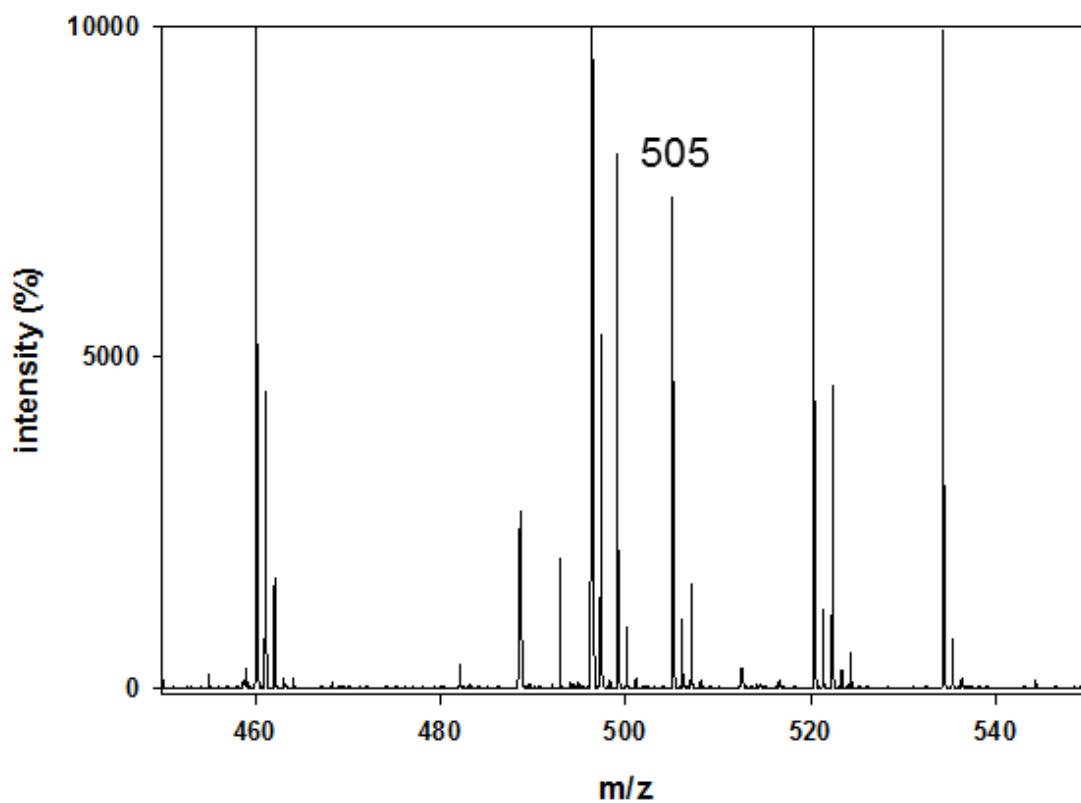

**Figure S8-17** Mass spectrum for the analysis of indometacin spiked in human plasma,  $[M+H]^+$  signal appears at  $m/z$  505.

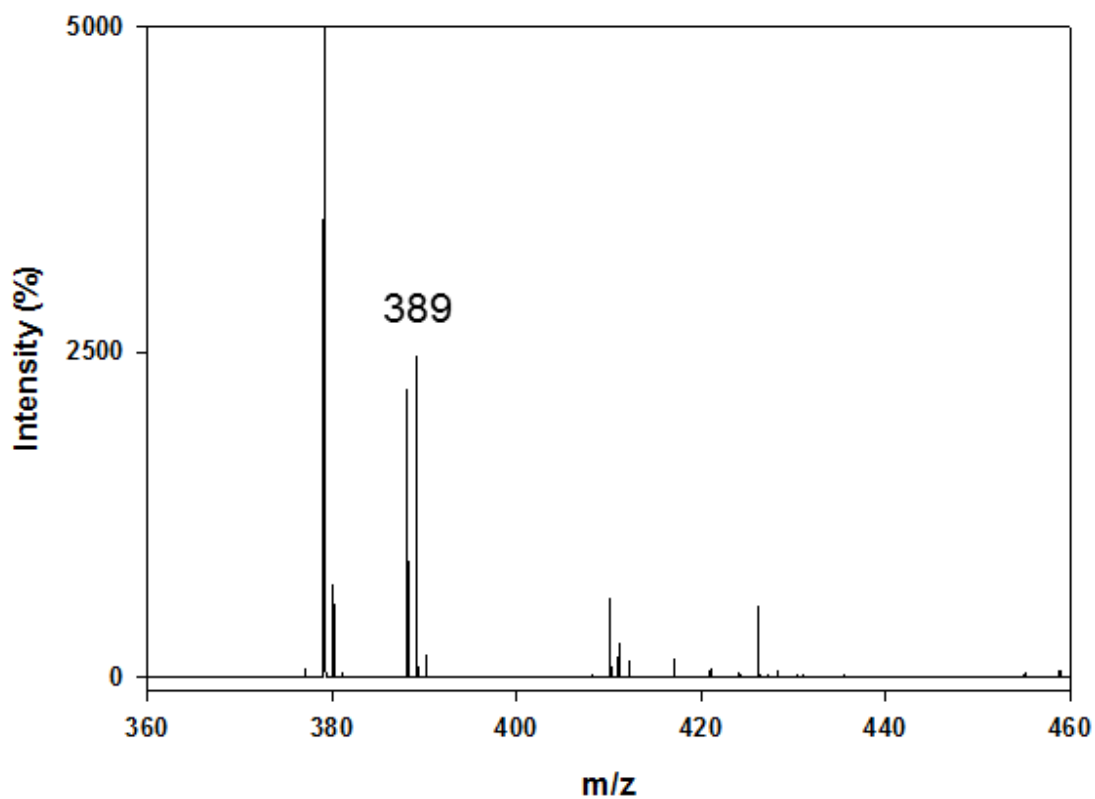

**Figure S8-18** Mass spectrum for the analysis of mefenamic acid spiked in human plasma,  $[M+H]^+$  signal appears at  $m/z$  389.

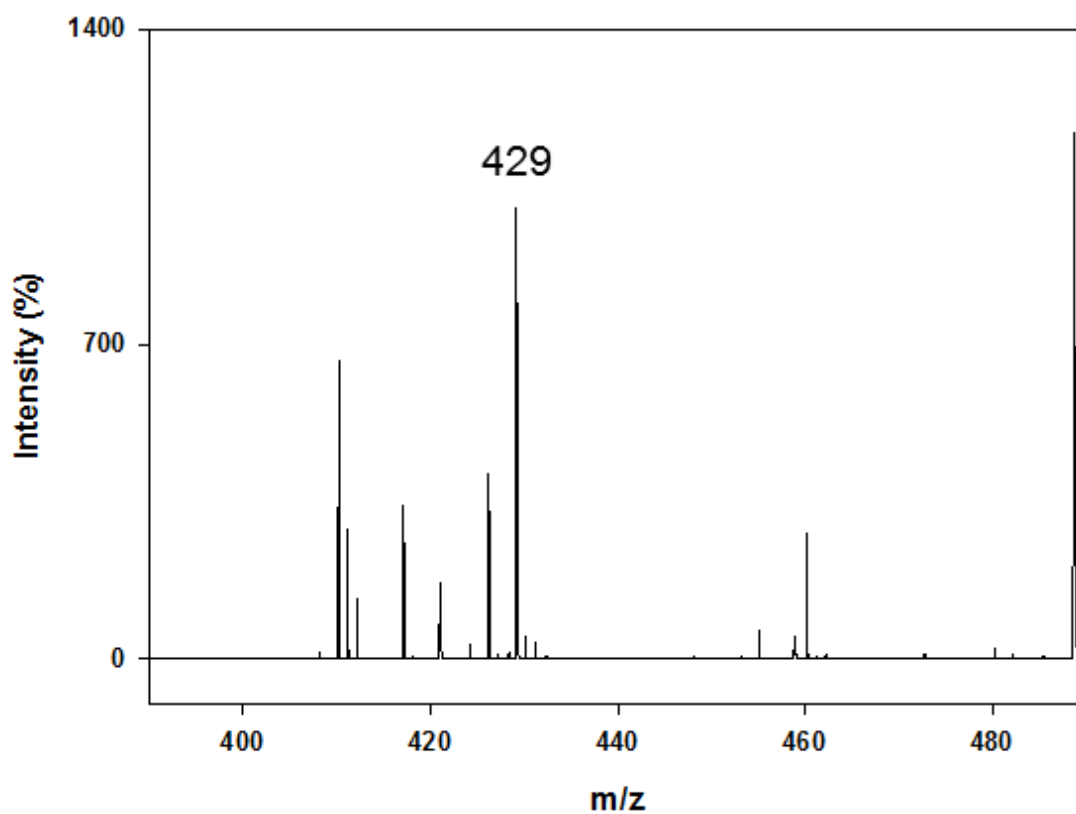

**Figure S8-19** Mass spectrum for the analysis of flufenamic acid spiked in human plasma,  $[M+H]^+$  signal appears at  $m/z$  429.
